# A role for Syndecan-4 in neural induction involving ERK- and PKC-dependent pathways

Sei Kuriyama and Roberto Mayor\*

Syndecan-4 (Syn4) is a heparan sulphate proteoglycan that is able to bind to some growth factors, including FGF, and can control cell migration. Here we describe a new role for Syn4 in neural induction in *Xenopus*. Syn4 is expressed in dorsal ectoderm and becomes restricted to the neural plate. Knockdown with antisense morpholino oligonucleotides reveals that Syn4 is required for the expression of neural markers in the neural plate and in neuralised animal caps. Injection of Syn4 mRNA induces the cell-autonomous expression of neural, but not mesodermal, markers. We show that two parallel pathways are involved in the neuralising activity of Syn4: FGF/ERK, which is sensitive to dominant-negative FGF receptor and to the inhibitors SU5402 and U0126, and a PKC pathway, which is dependent on the intracellular domain of Syn4. Neural induction by Syn4 through the PKC pathway requires inhibition of PKC $\delta$  and activation of PKC $\alpha$ . We show that PKC $\alpha$  inhibits Rac GTPase and that c-Jun is a target of Rac. These findings might account for previous reports implicating PKC in neural induction and allow us to propose a link between FGF and PKC signalling pathways during neural induction.

**KEY WORDS:** Neural induction, Syndecan-4, FGF, PKC, Rac, JNK, AP-1, c-Fos

## INTRODUCTION

The 'default model' of neural induction proposes that neural development occurs as a result of the inhibition of BMP signalling in the embryonic ectoderm, and that in the absence of cell-cell signalling, ectodermal cells will adopt a neural fate (Munoz-Sanjuan and Brivanlou, 2002; Weinstein and Hemmati-Brivanlou, 1997). There is compelling evidence that BMP signalling and its modulation by endogenous inhibitors are involved in the specification of neural and non-neural domains in *Xenopus* (Iemura et al., 1998; Piccolo et al., 1996; Sasai et al., 1994; Smith et al., 1993). However, several challenges to the default model have originated from studies in chick and ascidians, as well as from more recent experiments in *Xenopus* (for a review, see Stern, 2005). There is now convincing evidence that in addition to BMP inhibition, other signals are required for neural induction. One of these is FGF, which is involved in the induction of neural tissue in chick and *Xenopus*, as well as in *Ciona* (Hongo et al., 1999; Launay et al., 1996; Streit et al., 2000; Tannahill et al., 1992; Wilson et al., 2000; Bertrand et al., 2003). It has been proposed that FGF regulates neural induction in animal caps and in *Xenopus* embryos by activation of MAPK, which in turn phosphorylates the BMP target Smad1, contributing to the inhibition of BMP signalling (Fuentealba et al., 2007; Graves et al., 1994; Grunz and Tacke, 1989; Hartley et al., 1994; Kuroda et al., 2005; Pera et al., 2003; Sato and Sargent, 1989). However, it is not known how the activity of FGF is regulated in the embryo to account for its role during neural induction. As it is well established that several proteoglycans (PGs) can regulate the activity of FGF, in some cases working as co-receptors, we decided to study the role of PGs as potential modulators of FGF during neural induction.

PGs are extracellular glycoproteins that contain sulphated glycosaminoglycan (GAG) chains. Biochemical and cell culture assays have implicated PGs as co-regulators of many growth factors, including FGF, HGF, Wnt, TGF $\beta$  and BMP (Bernfield et al., 1999;

Iozzo, 1998). The GAG chains can be of heparan, chondroitin or dermatan sulphate (Bernfield et al., 1999; Iozzo, 1998). Syndecan-4 (Syn4) is a heparan sulphate PG reported to modulate FGF signalling in vitro (Iwabuchi and Goetinck, 2006; Tkachenko et al., 2004; Tkachenko and Simons, 2002). In addition, Syn4 interacts with chemokines (Brule et al., 2006; Charnaux et al., 2005) and with the planar cell polarity (PCP) pathway (Matthews et al., 2008; Muñoz et al., 2006). As Syn4 also interacts with fibronectin and integrins and is required for the formation of focal adhesions (Woods and Couchman, 2001), its main role has been thought to be in cell migration. However, Syn4 is also able to modulate PKC- and small GTPase-dependent intracellular signalling (Bass et al., 2007; Horowitz et al., 1999; Horowitz and Simons, 1998; Keum et al., 2004; Matthews et al., 2008).

Here, we investigate the role of Syn4 in neural induction in *Xenopus*. We report that Syn4 is expressed in ectoderm and becomes restricted to the neural plate. Loss-of-function experiments show that Syn4 is required for neural induction, whereas misexpression of Syn4 can induce the expression of neural markers in animal caps or ventral ectoderm. We also report that Syn4 activates two parallel pathways: the FGF/ERK pathway, previously implicated in neural induction, and the PKC $\alpha$ /Rac/JNK pathway.

## MATERIALS AND METHODS

### *Xenopus* embryos, animal cap assay and microinjection

*Xenopus* embryos were obtained as described (Newport and Kirschner, 1982). Embryos were staged according to Niewkoop and Faber (Niewkoop and Faber, 1967). For normal development, embryos were incubated in 0.1  $\times$  Marc's Modified Ringer's Solution (MMR) until they reached the appropriate stage. Animal caps were dissected at stage 9 and analysed at stage 14. Injected mRNA was synthesised using the mMessage mMachine Kit (Ambion) following the manufacturer's instructions. For the RacN17 experiments, we added a poly(A) sequence that was not included in the original clone (Tahinci and Symes, 2003). Grafting of neuroectoderm has been described (Linker and Stern, 2004). For 32-cell stage injection, the cell lineage was as described (Moody, 1987).

### Morpholino oligonucleotide and whole-mount in situ hybridisation

The Syn4 morpholino oligo (MO) was the same as that described previously (Muñoz et al., 2006; Matthews et al., 2008). For rescue experiments, we used point-mutated Syn4 as described (Matthews et al., 2008).

Department of Cell and Developmental Biology, Faculty of Life Sciences, University College London, Gower Street, London WC1E 6BT, UK.

\*Author for correspondence (e-mail: r.mayor@ucl.ac.uk)

For in situ hybridisation, we followed the procedures described by Harland (Harland, 1991), with the modifications described by Kuriyama et al. (Kuriyama et al., 2006).

#### Western blot

SDS-PAGE and blotting were performed using NuPAGE Novex Bis-Tris Gels (Invitrogen) following the manufacturer's instructions, and PVDF membrane (Amersham) was used for transfer blotting. Samples were taken from animal caps at the appropriate stages, and homogenised with buffer containing anti-phosphorylation reagent (Sigma) and protease inhibitor cocktail (Roche). Antibodies for p42/44 MAPK and phosphorylated p42/44 MAPK were used at 1/1000 (Cell Signaling) in 4% BSA in TBST, and anti c-Fos antibody (Santa Cruz) was used at 1/400 in 10% horse serum in TBST. After three washes, anti-rabbit IgG (H+L) horseradish peroxidase (HRP) conjugate (Jackson ImmunoResearch) was applied as secondary antibody at 1/25,000. Signal was visualised with luminescent HRP substrate and exposed to film (Fuji).

#### Confocal microscopy

The mRNA for fluorescent fusion proteins (PKC $\delta$ -EGFP or PKC $\alpha$ -EGFP) was injected at the 2-cell stage in both blastomeres. The membrane was visualised by co-injection of mRNA for membrane monomeric Cherry (mCherry) protein. In Fig. 5, the animal caps were dissected at stage 8, treated with 2  $\mu$ M phorbol ester (Sivak et al., 2005) or 10 ng/ml FGF2 (R&D), and fixed in MEMFA for 20 minutes. In Fig. 6, mCherry mRNA with MO was injected into 16-cell stage embryos after injection of PKC $\alpha$ -EGFP mRNA at the 2-cell stage. Images were taken with a Leica SP2 confocal microscope.

#### Clones and constructs

Full-length cDNA clones (NIBB) were used for the analysis of *Syn4* expression; these give a stronger signal than the probe previously published by Muñoz et al. (Muñoz et al., 2006). The National Institute for Basic Biology (Japan) reference number of *Syn4.1* is XL201e11, and *Syn4.2* is XL457P08ex. The cDNA of the *c-Fos* gene was isolated from *Xenopus* neurula cDNA, and initially cDNA containing the 3'UTR was amplified by RT-PCR with the following primers (sequences according to EST clone MGC80305): XbaI-XI-c-Fos Fw, 5'-CCGTCTAGAACAGAGCAGGATTTGCATTATA-3' and XI-c-Fos Rv, 5'-ACAGAATTCACAACAA-GTCCATGCCAGT-3'. *Xenopus laevis* c-Fos shares 63-65% identity with c-Fos from other species (data not shown). The *Xenopus laevis* c-Fos ORF was amplified using the following primers: ClaI-c-Fos Fw, 5'-ATATC-GATGTATCACGCCCTTCTCCAGCA-3' and XhoI-c-Fos Rv, 5'-GCA-CTCGAGTGCCAATAGGGTAGGGGAGTT-3'. After checking that there were no mutations in the sequence, the ORF was subcloned into the pCS2+-GR vector.

#### Rac activation assay

Rac activity was analysed using the Rac1 Activation Assay Biochem Kit (Cytoskeleton). Animal caps were dissected at stage 9 and cultured until stage 10.5 (data not shown) or 11.5. The total amount of protein used to bind the PAK-RBD beads was adjusted in a pilot experiment using Bradford analysis (BioRad). Around 100 animal caps were dissected for each condition, cell lysates were centrifuged to remove the yolk fraction, and the supernatants were used for the GDP/GTP-binding reaction according to the manufacturer's instructions. Positive (GTP-bound) and negative (GDP-bound) controls were performed as described by the manufacturer. For pulldown of active Rac, 10  $\mu$ g of PAK-RBD beads was applied to each sample, boiled with Laemmli sample buffer (Invitrogen) and loaded onto the gel.

## RESULTS

### *Syn4* is required for neural induction

We started by examining the expression of *Syn4* by whole-mount in situ hybridisation. As the mesodermal expression of *Syn4* has already been described (Muñoz et al., 2006), we focused on the ectodermal expression pattern. A longer *Syn4* probe (see Materials and methods), which gives stronger staining than the probe

described by Muñoz et al. (Muñoz et al., 2006), allowed us to characterise the neuroectodermal expression of *Syn4*. During blastula stages, *Syn4* is expressed transiently in a wide region of the ectoderm (Muñoz et al., 2006) and very quickly becomes enriched in the prospective neural tissues at the early and mid-gastrula stages (Fig. 1A-D). During early neurula stages, *Syn4* expression was detectable only in the neural plate (Fig. 1E,G,I), resembling the expression of the neural plate marker *Sox2* (Fig. 1F,H,J).

To determine whether *Syn4* is required for neural induction, we performed loss-of-function experiments using a mixture of two antisense morpholino oligonucleotides (*Syn4* MOs), as previously reported (Muñoz et al., 2006; Matthews et al., 2008). Injection of *Syn4* MO into dorsal animal blastomeres at the 8-cell stage produced a strong inhibition of the neural plate markers *Sox2* and *Nrp1* on the injected side, whereas no inhibition was observed when a control MO

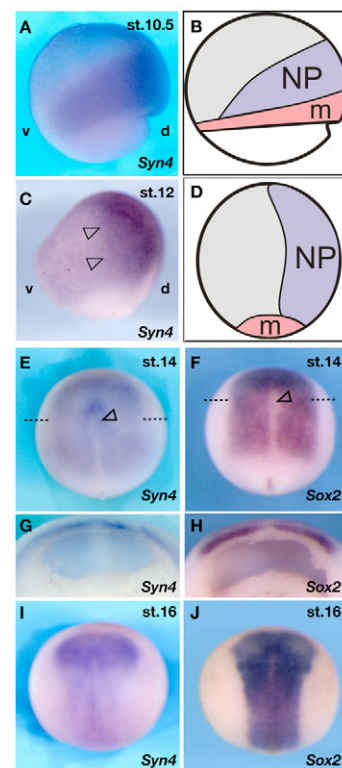

### Fig. 1. Dynamic expression of *Syn4* in the neural plate region.

Whole-mount in situ hybridisation analysis of *Syn4* and *Sox* expression. (A) Lateral view of a stage 10.5 *Xenopus* embryo showing *Syn4* expression in the dorsal marginal zone. Dorsal (d) to the right; ventral (v), left; animal pole to the top. (B) Fate map of a stage 10.5 embryo, shown in the same orientation as in A. NP, prospective neural plate; m, prospective mesoderm. (C) At stage 12, *Syn4* expression (arrowheads) is restricted to the dorsal region of the embryo (orientation as in A). (D) Fate map of a stage 12 embryo, shown in the same orientation as in C. NP, neural plate. (E) At stage 14, *Syn4* expression is seen in the neural plate, but is absent from the dorsal midline (arrowhead). Dashed line indicates the plane of the section in G. (F) Stage 14 embryo showing *Sox2* expression. The expression pattern is similar to that of *Syn4* in E. Dashed line indicates the plane of the section in H. Arrowhead, dorsal midline. (G) Section of a stage 14 embryo, showing *Syn4* expression. No expression is observed at the midline or in mesoderm. (H) Section of a stage 14 embryo, showing *Sox2* expression (I) At stage 16, *Syn4* expression is seen in the neural plate. (J) *Sox2* expression at stage 16.



was injected (Fig. 2A,B,E,F). A similar inhibition of neural plate markers was observed when the injected embryos were analysed at later stages, indicating that the effect of Syn4 MO is not merely a delay in gene expression, but a true inhibition (see Fig. S1A,B in the supplementary material). As the injection at the 8-cell stage might target some mesodermal cells and affect neural induction indirectly, we used two approaches to inhibit *Syn4* selectively in the prospective

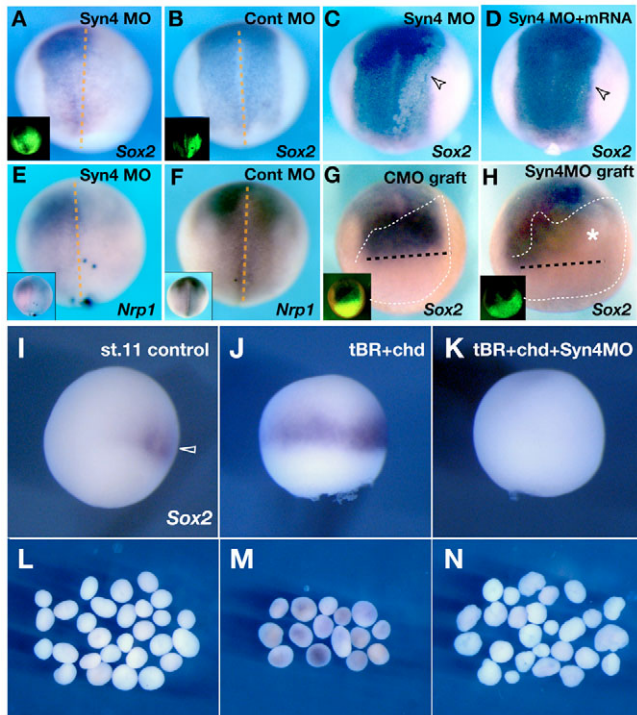

**Fig. 2. Syn4 is required for neural induction.** *Sox2* and *Nrp1* expression was analysed by whole-mount in situ hybridisation. (A-H) MO-injected samples analysed at stage 14. The lineage tracer in shown in the insets. (A) Syn4 MO injected in one animal blastomere of an 8-cell stage *Xenopus* embryo. Note the inhibition of *Sox2* expression on the injected (right-hand) side (60%,  $n=45$ ). (B) Similar to A, but injection with control MO. No effect on *Sox2* expression is observed (0%,  $n=57$ ). (C) Syn4 MO was injected into the dorsal animal blastomere (A1) at the 32-cell stage. Note the inhibition of *Sox2* expression in the injected region (arrowhead) (55%,  $n=50$ ). (D) Syn4 mRNA mutated in the MO sequence region was co-injected with Syn4 MO into the A1 blastomere of a 32-cell stage embryo. Note the rescue of the expression of *Sox2* (8%,  $n=66$ ). (E) Syn4 MO injected into one animal blastomere of an 8-cell stage embryo. Note the inhibition of *Nrp1* expression on the injected side (95%,  $n=42$ ). (F) No inhibition is observed with the control MO (0%,  $n=21$ ). (G) Control-morpholino-injected ectoderm was grafted into an uninjected embryo. *Sox2* expression is normal (100%,  $n=10$ ). Black dashed line indicates the anterior border of *Sox2* expression. White dashed line outlines the graft. Inset shows the position of the graft by its fluorescence. (H) Syn4 MO-injected ectoderm was grafted into an uninjected embryo. *Sox2* expression is absent from the grafted area (asterisk; 70%,  $n=10$ ). Inset shows the position of the graft by its fluorescence. (I-N) Analysis of *Sox2* expression at stage 11. (I) Expression of *Sox2* is initially observed in the dorsal region (arrowhead). (J) Expansion of *Sox2* expression by BMP inhibition [BMP antagonists: truncated BMP receptor (tBR) and chordin (chd) mRNA]. (K) Early induction of *Sox2* was eliminated by co-injection of Syn4 MO (69%,  $n=50$ ). (L) Control animal caps, showing no expression of *Sox2*. (M) Animal caps taken from embryos injected as in J, showing weak upregulation of *Sox2*. (N) Animal caps taken from embryos as in K. Co-injection of Syn4 MO blocks *Sox2* induction.

neural plate. First, Syn4 MO was injected at the 32-cell stage into the A1 blastomere, which is fated to contribute to the neural plate but not to the mesoderm (Moody, 1987). *Sox2* expression was inhibited in descendants of these Syn4 MO-injected cells (Fig. 2C). This is specific for Syn4 because it could be rescued by co-injection of mRNA encoding a mutated Syn4 that does not bind to the MO (Fig. 2D). As an alternative approach, prospective neural plate taken from an early neurula embryo injected with Syn4 MO or control MO was grafted into the early neurula of an uninjected host, creating an embryo in which Syn4 MO is present only in the neural plate. The control graft still showed normal *Sox2* expression (Fig. 2G), whereas grafts of Syn4 MO-injected tissue showed loss of *Sox2* expression (Fig. 2H, asterisk). These results show that Syn4 is required in the ectoderm for neural plate induction.

To analyse the mechanism by which Syn4 MO blocks neural plate development, we asked whether it might interfere with BMP signalling. Inhibition of BMP signalling by a combination of BMP antagonists causes expansion of the early expression of *Sox2* in the embryo and in animal caps analysed at stage 11 (Fig. 2I,J,L,M) (Rogers et al., 2008). When co-injected with these BMP antagonists, Syn4 MO still blocked *Sox2* expression in the embryo and in animal caps (Fig. 2K,N), suggesting that Syn4 does not function as a BMP antagonist in neural induction. Furthermore, if Syn4 is a BMP antagonist, it would be expected to dorsalise mesoderm and to induce a secondary axis, as do all BMP antagonists (Harland, 1994). Whereas chordin mRNA did induce a secondary axis, no such effect was observed after injection of Syn4 mRNA (see Fig. S2A,B in the supplementary material), consistent with the notion that Syn4 does not block BMP signalling.

### Overexpression of Syn4 neuralises the ectoderm

The above results suggest that Syn4 is required for neural plate formation. To test whether Syn4 can induce a neural fate, Syn4 mRNA was injected at the 32-cell stage into the A4 blastomere (which does not contribute cells to the neural plate) (Moody, 1987). Inhibition of BMP in this blastomere does not induce neural tissue (Linker and Stern, 2004). By contrast, injection of Syn4 mRNA into A4 did lead to induction of *Sox2* and *Sox3* in the ventral epidermis (Fig. 3A,B; see Fig. S2C,D in the supplementary material) and to inhibition of epidermal marker expression (Fig. 3C,D), without induction of mesodermal markers (Fig. 3G-J). The induction of neural markers by Syn4 is not transient, as they were still expressed at the late neurula stages (see Fig. S2H,I in the supplementary material). Interestingly, this neuralisation by Syn4 was not blocked by co-injection of a MO against *chordin* (see Fig. S2E-G in the supplementary material) (Oelgeschläger et al., 2003), which is consistent with the idea that neural induction by Syn4 is BMP independent. Furthermore, this induction of *Sox2* is cell-autonomous to the descendants of the injected cell, as revealed by co-injection of nuclear  $\beta$ -galactosidase as a lineage tracer: all *Sox2*-positive, epidermal keratin (*EpK*)-negative cells exhibited X-Gal staining in the nucleus (Fig. 3E,F). Finally, overexpression of *Syn4* induced neural plate markers and inhibited epidermal markers in isolated animal caps (Fig. 3K-N; see Fig. S2J,K in the supplementary material), without expression of mesodermal markers (not shown). Together, these gain- and loss-of-function experiments support a role for *Syn4* in neural plate development.

### The FGF/MAPK signalling pathway is required for neural induction by Syn4

As Syn4 is a proteoglycan that binds growth factors, including FGF, through its extracellular GAG chains, but can also modulate intercellular signalling through its intracellular domain (Couchman,

2003), we tested a set of deletion constructs of Syn4 for neuralising ability. mRNA for each of these constructs was injected into the A4 blastomere of a 32-cell stage embryo and their ability to induce neural tissue was compared with that of full-length Syn4 mRNA.

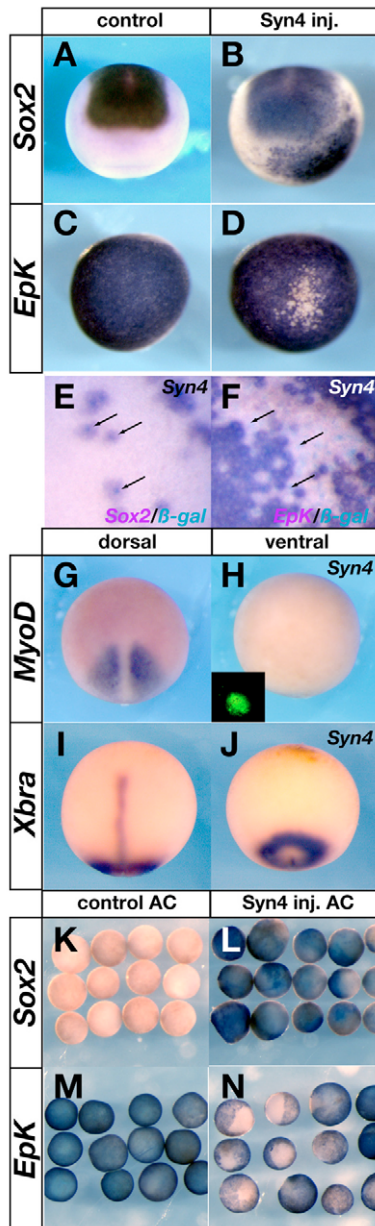

**Fig. 3. Syn4 overexpression neuralises ectoderm.** (A–D) Anterior view, dorsal to the top (A,B); ventral view (C,D). (A,C) 500 pg of NLS- $\beta$ -gal mRNA was injected into the A4 blastomere of a 32-cell stage *Xenopus* embryo, and the expression of *Sox2* (A) and epidermal keratin (*Epk*) (C) was analysed by in situ hybridisation. (B,D) 1 ng of Syn4 mRNA was injected into the A4 blastomere of a 32-cell stage embryo, and the expression of *Sox2* (C; 96% of induction,  $n=87$ ) and *Epk* (D; 80% of inhibition,  $n=70$ ) was analysed. (E,F) Higher magnification of embryos injected as in B,D. Arrows indicate nuclei stained with X-Gal (blue). (G–J) Dorsal (G,I) and ventral (H,J) views of embryos injected as in B with Syn4 mRNA. No ectopic expression of *MyoD* (0%) or *Xbra* (0%) was observed. Inset in H shows injected fluorescein. (K–N) Animal cap (AC) assay for *Sox2* (K,L) or *Epk* (M,N) expression. (K,M) Control caps express only *Epk*. (L,N) Syn4 mRNA-injected animal caps express *Sox2* and downregulate *Epk*.

Deletion of the GAG-binding domain (Syn4 $\Delta$ GAG) caused a modest, but reproducible, loss of neural induction ability (see Fig. S3 in the supplementary material), whereas deletion of the intracellular domain (Syn4 $\Delta$ CytCherry) had a stronger effect (see Fig. S3 in the supplementary material). Together, these experiments implicate both the extracellular and intracellular domains of Syn4 in neural induction (see Fig. S3 in the supplementary material).

Syn4 is known to modulate FGF activity (Tkachenko et al., 2004) and FGF is involved in neural induction (Funtealba et al., 2007; Kuroda et al., 2005; Streit et al., 2000; Wilson et al., 2000). This raises the possibility that the effects of Syn4 gain- and loss-of-function are due to interference with FGF signalling. Neural induction by Syn4 in animal caps (Fig. 4A,B) was inhibited by co-injection of a dominant-negative FGF receptor (XFD-1) (Fig. 4C), as well as by the presence of the FGF receptor inhibitor SU5402 (Fig. 4D) or the MEK inhibitor U0126 (Fig. 4E), but not by the inactive analogue U0124 (Fig. 4F). Moreover, Syn4 induced phosphorylation of MAPK in animal caps cultured to stage 12.5 (the stage at which neural induction was analysed) (Fig. 4G, lanes 1, 2). Note that although FGF promotes MAPK phosphorylation at early gastrula stages (Sivak et al., 2005), this effect is not maintained when

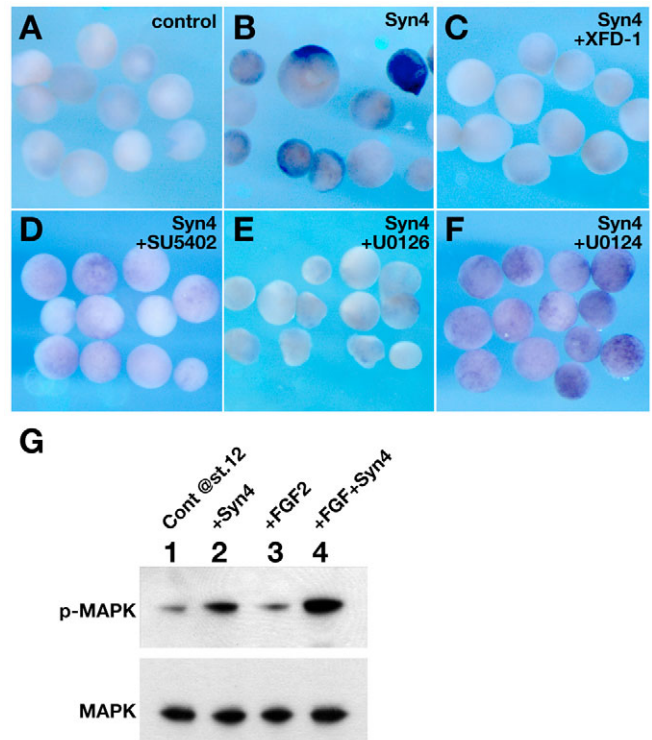

**Fig. 4. The FGF/MAPK pathway is required for neural induction by Syn4.** (A–F) *Sox2* expression analysed by whole-mount in situ hybridisation in *Xenopus* animal caps. (A) Control caps. No *Sox2* expression. (B) Syn4-injected caps express *Sox2*. (C) Co-injection of Syn4 and a dominant-negative form of FGF receptor 1 (XFD-1) inhibits *Sox2* expression. (D) Syn4-injected caps treated with 40  $\mu$ M SU5402 (in DMSO) do not show *Sox2* expression. (E) Syn4-injected caps treated with 80  $\mu$ M U0126 do not express *Sox2*. (F) Syn4-injected caps treated with 80  $\mu$ M U0124 show expression of *Sox2*. (G) Animal caps were injected as indicated (Cont, control) and samples taken for western blot analysis of MAPK phosphorylation at the equivalent of stage 12. Antibodies against MAPK or phosphorylated MAPK (p-MAPK) can recognise both p42 and p44 as a single band. Each experiment was repeated three times with at least 50 animal caps.



the animal caps are cultured until stage 12.5 (Fig. 4G, compare lanes 1 and 3). However, a high level of MAPK phosphorylation was observed at these stages in animal caps treated with FGF and Syn4 (Fig. 4G, lane 4). Together, these results indicate that Syn4 cooperates with FGF to activate the FGF/MAPK signalling pathway and that this activation is required for neural induction.

### Syn4 inhibits the PLC-PKC pathway

The above results implicate the extracellular GAG-binding domain of Syn4 in neural induction. However, other experiments presented above revealed that deletion of the intracellular domain of Syn4 has an even stronger effect on neural induction.

The PLC/PKC pathway is involved in both FGF and Syn4 signalling (Simons and Horowitz, 2001; Sivak et al., 2005). Moreover, PKC has been implicated in neural induction (Otte et al., 1988; Otte et al., 1989; Otte et al., 1990; Otte et al., 1991; Otte and Moon, 1992), although this has never been clearly connected with FGF or BMP signalling. Activation of the PLC/PKC pathway by FGF leads to translocation of PKC $\delta$  to the membrane (Kinoshita et al., 2003; Sivak et al., 2005). We tested whether this change in localisation is Syn4 dependent. PKC $\delta$ -GFP distribution was diffuse in untreated animal caps (Fig. 5A-C), but on addition of the PKC activator, phorbol ester (PMA), or of FGF2, the fusion construct translocated to the cell membrane and colocalised with membrane Cherry (Fig. 5G-L). Strikingly, overexpression of Syn4 not only failed to promote PKC $\delta$ -GFP membrane translocation (Fig. 5D-F), but also inhibited translocation triggered by FGF2 (Fig. 5M-O). These results suggest that Syn4 modulates FGF signalling by inhibiting PKC $\delta$  activity.

### PKC $\delta$ and PKC $\alpha$ as downstream effectors of Syn4 during neural induction

As Syn4 inhibits PKC $\delta$  activity and induces neural tissue, we asked whether direct inhibition of PKC $\delta$  is sufficient to neuralise ventral ectoderm. Injection of a dominant-negative PKC $\delta$  RNA (DN-PKC $\delta$ ) (Kinoshita et al., 2003) into the A4 blastomere induced *Sox2* (Fig. 6A), whereas injection of wild-type PKC $\delta$  mRNA into the endogenous neural plate region led to inhibition of neural plate marker expression (see Fig. S1C,E in the supplementary material). Furthermore, neural induction by Syn4 mRNA was inhibited by co-injection of PKC $\delta$  mRNA (Fig. 6B). These results support the conclusion that *Syn4* inhibits *PKC $\delta$*  expression and that this inhibition is required for the neuralising activity of *Syn4*.

To understand more about the mechanism of neural induction by Syn4, we analysed some candidate downstream effectors of this PKC $\delta$  inhibition. It has been shown in many systems that PKC $\delta$  and PKC $\alpha$  activities repress each other (Kinoshita et al., 2003; Choi and Han, 2002) and that PKC $\alpha$  is implicated in neural induction (Otte et al., 1988). Consistent with these findings, we found that injection of PKC $\alpha$  mRNA into the A4 blastomere induces *Sox2* (Fig. 6C) and inhibits *EpK* (see Fig. S1H in the supplementary material), whereas co-injection of PKC $\delta$  mRNA (Fig. 6D) blocks this process.

In conclusion, our data support the hypothesis that activation of PKC $\alpha$  and inhibition of PKC $\delta$  promote neural induction, and that these two kinases antagonise each other. The inhibition of *PKC $\delta$*  expression by Syn4 mRNA and the inhibition of *PKC $\delta$*  expression by PKC $\alpha$  mRNA prompted us to analyse the relationship between Syn4 and PKC $\alpha$  in neural induction. We found that the induction of *Sox2* by PKC $\alpha$  mRNA (Fig. 6E) is inhibited by co-injection of Syn4 MO (Fig. 6F), whereas dominant-negative PKC $\alpha$  RNA blocks neural induction by Syn4 (Fig. 6G). Observations in cultured cells indicate that Syn4 recruits phosphatidylinositol 4,5-bisphosphate

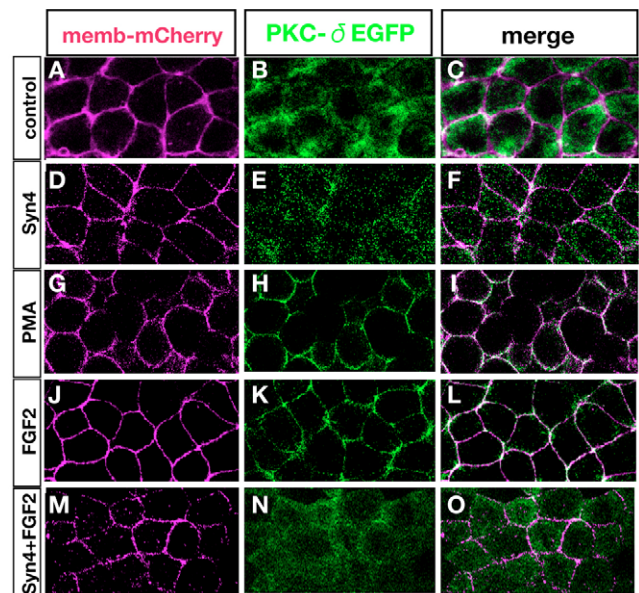

**Fig. 5. Membrane translocation of PKC $\delta$  by FGF is inhibited by Syn4.** *Xenopus* animal caps analysed by confocal microscopy after injection/treatment as indicated. (A-C) Control animal cap shows cytoplasmic localisation of PKC $\delta$ . (D-F) Animal caps injected with Syn4 mRNA. PKC $\delta$  shows cytoplasmic distribution. (G-L) Phorbol ester (PMA; G-I) or FGF2 (J-L) triggers the translocation of PKC $\delta$  into the membrane. (M-O) Syn4 inhibits the translocation of PKC $\delta$  activated by FGF2.

(PIP<sub>2</sub>) and translocates PKC $\alpha$  to the membrane (Keum et al., 2004). We analysed the localisation of a PKC $\alpha$ -EGFP fusion protein that retains its neuralising activity when injected into ventral ectoderm (Fig. 6H). PKC $\alpha$ -EGFP expressed in animal caps showed a spontaneous membrane localisation that was not affected by co-injection with control MO (Fig. 6I-K). However, mosaic expression of Syn4 MO (cells labelled with an asterisk in Fig. 6L-N) led to a complete absence of PKC $\alpha$ -EGFP from the membrane, indicating that Syn4 is required for the activation of PKC $\alpha$ . We therefore propose that neural induction by *Syn4* is mediated by activation of PKC $\alpha$  and that this activation requires *Syn4*.

*Syn4* induces neural tissue in a MAPK- and PKC $\alpha$ -dependent manner. What is the link between the MAPK and PKC $\alpha$  activities? PKC $\alpha$  is known to activate MAPKs, including p38-MAPK, ERK and JNK (Mauro et al., 2002; Rucci et al., 2005; Seo et al., 2004; Skaletzrrowski et al., 2005; Wensheng, 2006). However, we found no evidence that neural induction by PKC $\alpha$  depends on MAPK. First, induction of *Sox2* in animal caps by PKC $\alpha$  (Fig. 7A, lane 3) was not inhibited by the MEK inhibitor U0126 (Fig. 7A, lane 4), in spite of the strong inhibition of phosphorylated MAPK (p-MAPK in Fig. 7A, lane 4). Second, PKC $\alpha$  did not affect the phosphorylation of MAPK, as analysed by western blot (Fig. 7A,B). Therefore, our results do not support a direct link between MAPK activity and PKC $\alpha$  during neural induction, a discovery that prompted us to look for downstream effectors of PKC $\alpha$  in neural induction.

### Rac/AP-1 as downstream effectors of PKC $\alpha$ during neural induction

We have recently shown that Syn4 is a repressor of the small GTPase Rac during neural crest migration in vivo (Matthews et al., 2008), whereas the Syn4/PKC/Rac/RhoA signalling complex

appears to be a key regulator of cell migration in vitro (Couchman, 2003). Could a similar pathway be involved in neural induction? Our results showed that the normal levels of Rac activity found in a control animal cap (Fig. 7C, AC lane 2) are strongly inhibited by expression of Syn4 (Fig. 7C, Syn4 lane 4). Furthermore, our data suggest that the inhibition of Rac activity by PKC $\alpha$  is a requirement

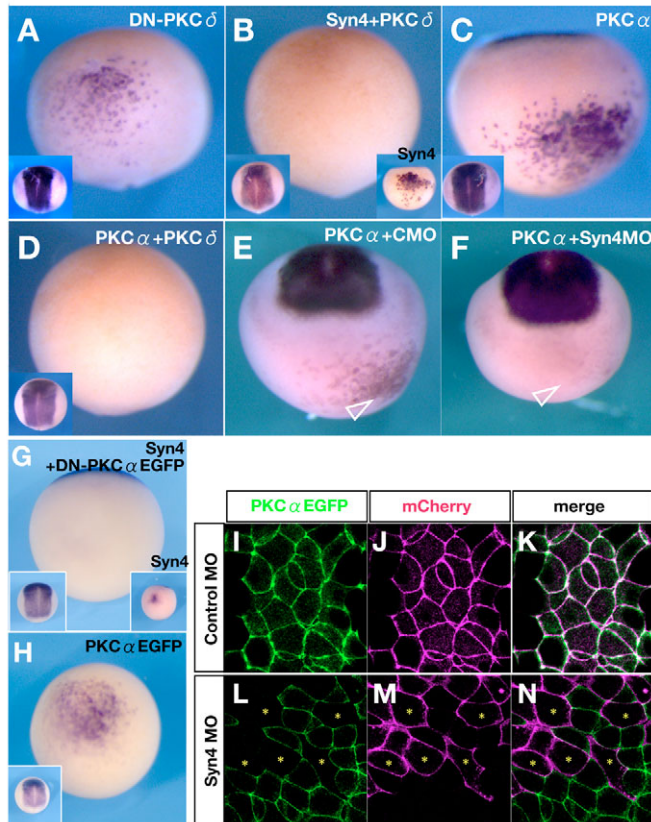

**Fig. 6. Inhibition of PKC $\delta$  or activation of PKC $\alpha$  is essential for neural induction by Syn4.** (A-H) *Sox2* expression in *Xenopus* embryos injected, as indicated, into A4 blastomeres at the 32-cell stage. (A-D) Ventral view, dorsal to the top. Insets on left show a dorsal view. (A) Dominant-negative *Xenopus* PKC $\delta$  (DN-PKC $\delta$ ). Note the ectopic *Sox2* induction (48%,  $n=71$ ). (B) Co-injection of Syn4 and *Xenopus* full-length PKC $\delta$  mRNAs represses the ectopic expression of *Sox2* (18%,  $n=91$ ). Inset on the right shows the ventral ectopic *Sox2* expression induced by Syn4 mRNA (95%,  $n=85$ ). (C) Human (h) PKC $\alpha$  mRNA can induce ectopic *Sox2* expression (68%,  $n=92$ ). (D) Co-injection of hPKC $\alpha$  and PKC $\delta$  mRNAs shows inhibition of neural induction (20%,  $n=124$ ). (E) Co-injection of hPKC $\alpha$  with control MO (CMO). Arrowhead indicates the ectopic expression of *Sox2* (70%,  $n=68$ ). (F) Co-injection of hPKC $\alpha$  mRNA with Syn4 MO. *Sox2* induction is not observed in the injected cells (arrowhead) (23%,  $n=51$ ). (G) Co-injection of Syn4 and a dominant-negative form of PKC $\alpha$  (DN-PKC $\alpha$ -EGFP) inhibits *Sox2* expression (15%,  $n=51$ ). (H) Injection of PKC $\alpha$ -EGFP mRNA. Ectopic induction of *Sox2* is similar to that upon PKC $\alpha$  injection, showing that EGFP does not affect the activity of the fusion protein. (I-N) Confocal images of animal caps injected as indicated. PKC $\alpha$ -EGFP mRNA was injected into both blastomeres at the 2-cell stage. At the 16-cell stage, Syn4 or control MO and membrane Cherry mRNA were injected into one blastomere. (I-K) PKC $\alpha$ -EGFP spontaneously localises at the membrane, colocalising with membrane Cherry. (L-N) The distribution of Syn4 MO can be identified by the fluorescence of mCherry. Note that cells with a high level of Syn4 MO (asterisks) exhibit a low level of PKC $\alpha$ -EGFP in the membrane.

for neural induction. Neural induction by PKC $\alpha$  misexpression (Fig. 7D) was inhibited by co-injection of a constitutively active form of Rac (Fig. 7E,F). In addition, expression of active Rac in the neural plate led to inhibition of the endogenous neural plate (see Fig. S1D,F in the supplementary material). By contrast, injection of a dominant-negative form of Rac into the A4 blastomere strongly induced *Sox2* (Fig. 7G), supporting the hypothesis that inhibition of Rac activity by Syn4/PKC $\alpha$  can induce neural tissue.

Hitherto, the Syn4/PKC/RhoA/Rac pathway has only been implicated in cell migration. Our data suggest that it also has an important role in cell specification. What could be the downstream target of Rac that is required for neural plate development? Rac is known to activate the c-Jun NH2 kinase (JNK), which promotes dimerisation of c-Jun and downregulates formation of the AP-1 complex (c-Jun/c-Fos) (Boyle et al., 1991). Previous reports suggest that the AP-1 complex is required for neural induction and that it binds directly to the promoter of the neural plate gene *Zic3* during this inductive process (Leclerc et al., 1999; Lee et al., 2004). One hypothesis is that the PKC $\alpha$ /Rac pathway facilitates formation of the heterodimeric AP-1 complex (c-Fos/c-Jun) during neural induction. To test this hypothesis, we constructed a hormone-inducible derivative of *Xenopus* c-Fos that cannot homodimerise (Halazonetis et al., 1988; Nakabeppu et al., 1988); it will only form the heterodimer c-Fos/c-Jun when c-Fos is overexpressed, and is therefore expected to increase formation of the AP-1 complex. A similar approach has been described using c-Fos-ER to activate AP-1 in fibroblasts (Reichmann et al., 1992). We made a construct containing the *Xenopus* c-Fos gene fused to the human glucocorticoid receptor (GR; see Materials and methods). Ectopic expression of c-Fos-GR was achieved by injecting mRNA into the A4 blastomere and adding dexamethasone at stage 10.5, which induced *Sox2* (Fig. 7H), whereas embryos that were not treated with dexamethasone did not upregulate *Sox2* (Fig. 7I). In addition, western blot analysis revealed that PKC $\alpha$  increases c-Fos protein levels in animal caps (Fig. 7B).

Overexpression of c-Fos-GR was also used to rescue neural induction inhibited by activation of Rac. Animal caps injected with chordin mRNA expressed *Sox2* (Fig. 7J,K), and, as expected, this induction was inhibited by expression of activated Rac (Fig. 7L). However, this inhibition of neural induction could be reversed by activation of the c-Fos-GR construct with dexamethasone (Fig. 7M). It should be noted that activation of c-Fos-GR is sufficient to neuralise the animal caps (Fig. 7N,O). In conclusion, our data are consistent with the idea that PKC $\alpha$  promotes the formation of AP-1 complexes that are required for neural induction through the inhibition of Rac.

## DISCUSSION

Here we demonstrate that Syn4 plays an important role in neural induction and identify the signalling pathways required for neural induction by Syn4. Inhibition of Syn4 in the ectoderm of whole embryos or in animal caps leads to strong inhibition of neural plate markers. Overexpression of Syn4 in ventral epidermis or animal caps is sufficient to induce neural tissue. At least two parallel signalling pathways are involved in this neural induction: FGF/MAPK and PKC/Rac/AP-1. We propose that the localised expression of Syn4 in the neural plate is required to modulate these two pathways.

The role of *Syn4* during *Xenopus* development has recently been analysed, revealing its key role as a new element of the PCP pathways during convergent extension and neural crest migration (Muñoz et al., 2006; Matthews et al., 2008). The apparent lack of



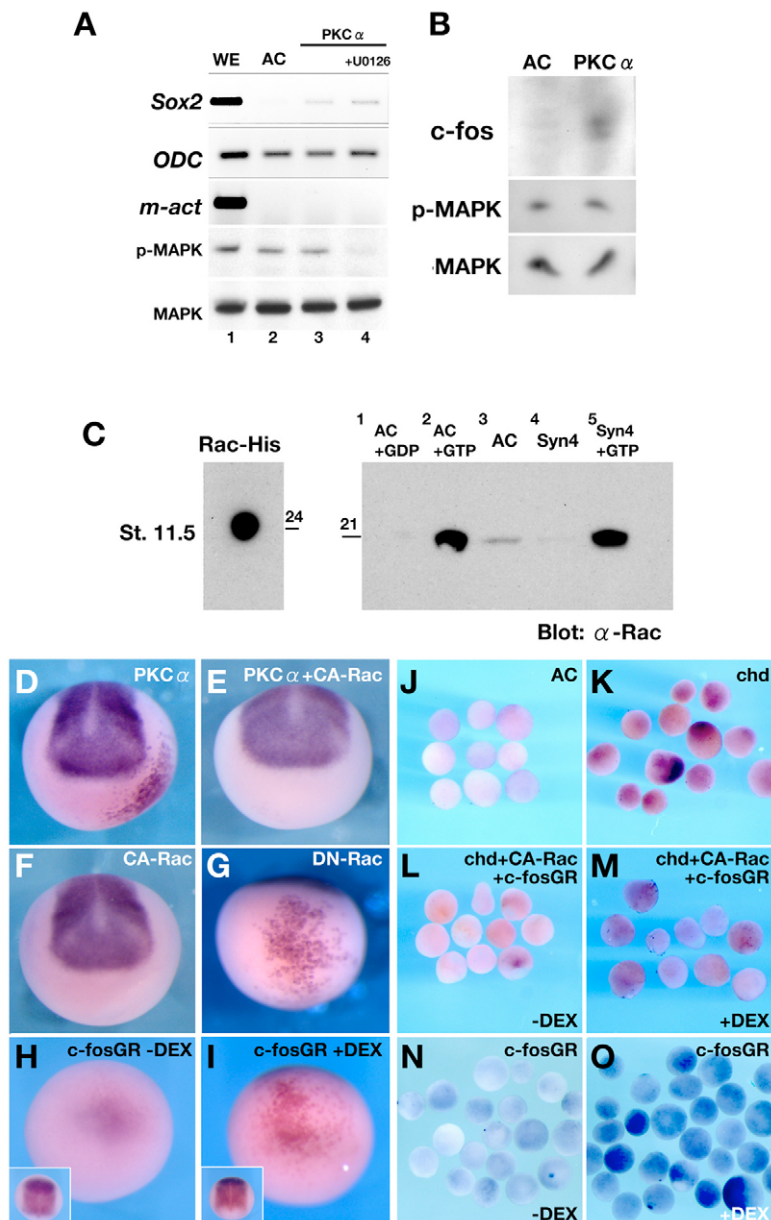

**Fig. 7. The PKC-dependent pathway of neural induction is mediated by the Rac/JNK/AP-1 pathway.** (A) RT-PCR of the indicated genes using RNA from *Xenopus* whole embryos (WE, lane 1), animal caps (AC, lane 2), animal caps expressing PKC $\alpha$  (PKC $\alpha$ , lane 3) or animal caps expressing PKC $\alpha$  and treated with the inhibitor U0126 (+U0126, lane 4). Note that *Sox2* is induced by PKC $\alpha$  even when MAPK is inhibited (lane 4). (B) Western blot of control- or PKC $\alpha$ -injected animal caps, detecting c-Fos, phosphorylated MAPK (p-MAPK) and MAPK. Neuralisation of the animal caps correlates with an increase in c-Fos levels, whereas p-MAPK is unchanged. (C) Rac activation assay. (Left) Rac1-His recombinant protein (24 kDa; 20 ng) was loaded and detected by anti-Rac antibody as a positive control. (Right) The same volume of reaction mix was loaded for each condition. Lane 1 (AC+GDP), negative control; lane 2 (AC+GTP), positive control that shows the total amount of Rac protein in the animal cap samples; lane 3 (AC), endogenous active Rac present in animal caps at stage 11.5; lane 4 (Syn4), endogenous active Rac present in animal caps at stage 11.5 injected with 500 pg of Syn4 mRNA (note that Syn4 abolishes endogenous Rac activity); lane 5 (Syn4+GTP), total amount of Rac protein after Syn4 injection. The experiment was repeated three times. (D-I) Whole-mount in situ hybridisation analysis of embryos injected, as indicated, into the A4 blastomere of 32-cell stage embryos. (D) Human (h) PKC $\alpha$  mRNA induces ectopic *Sox2* expression (68%,  $n=92$ ). (E) Co-injection of constitutively active Rac and hPKC $\alpha$  inhibits ectopic *Sox2* expression (21% of induction,  $n=34$ ). (F) Injection of constitutively active Rac does not induce *Sox2* expression (0%,  $n=32$ ). (G) Dominant-negative Rac1 mRNA induces ectopic ventral *Sox2* expression (90%,  $n=40$ ). (H,I) Ventral view of embryos injected with c-Fos-GR mRNA and activated with dexamethasone (DEX) at stage 10.5. Ectopic *Sox2* expression is observed only after DEX treatment (I), being absent when no DEX is added (H; inset shows dorsal side). (J-O) In situ hybridisation for *Sox2* in animal caps. (J) Control animal caps show no *Sox2* expression. (K) Animal caps from embryos injected with chordin (chd) mRNA show *Sox2* expression. (L) Animal caps from embryos injected with chordin, constitutively active Rac and c-Fos-GR mRNA but without adding DEX. Activation of Rac leads to inhibition of *Sox2*. (M) Similar to L, but c-Fos-GR is activated by DEX treatment. Rescue of *Sox2* expression is observed. (N) Injection of c-Fos-GR mRNA, but without adding DEX. (O) c-Fos-GR-injected animal caps activated with DEX show an increase in *Sox2* expression.

any effect on neural plate or neural crest induction in these previous reports is likely to be due to the targeting of different regions of the embryo. In order to see the effect of Syn4 MO on neural induction, the injection has to be targeted to the prospective neuroectoderm, whereas injections into prospective mesoderm, as published by Muñoz et al. (Muñoz et al., 2006), lead to convergent extension defects. In addition, *Syn4* is expressed in neural crest cells just before their migration starts, once they are already specified (Matthews et al., 2008) (and this work), which explains why the MO does not affect neural crest induction. Taken together, these previous publications and the data presented here indicate that the same signalling molecule can be involved in induction and cell migration at different times during development.

Although early findings implicating FGF in neural induction (Lamb and Harland, 1995; Alvarez et al., 1998; Hongo et al., 1999) were controversial, the evidence is now strong that FGF is indeed involved in the induction of neural tissue (Sasai et al., 1994; Smith et al., 1993; Launay et al., 1996; Linker and Stern, 2004; Pera et al.,

2003; Streit et al., 1998; Streit et al., 2000; Wilson et al., 2000). Moreover, FGF contributes to the inhibition of BMP signalling, at least in part by phosphorylation of Smad1 during neural induction (Fuentealba et al., 2007; Kuroda et al., 2005).

*Syn4* modulates FGF signalling through its extracellular domain (containing the GAG-binding region, which will present heparin sulphates to which FGF is expected to bind) and by an effect on the transduction of intracellular signals (Hou et al., 2007; Iwabuchi and Goetinck, 2006; Horowitz et al., 2002). Our data support the idea that FGF is required for neural induction and that *Syn4* is a likely modulator, by showing that the inhibition of FGF receptor and of MAPK activity impair neural induction by *Syn4*. *Syn4* could act as a co-receptor of the FGF receptor (Hou et al., 2007) or as a presenter of the FGF ligand, through binding of FGF to the GAG side-chains, to facilitate the activation of FGF receptor (Fig. 8A).

However, *Syn4* also plays a separate role in neural induction involving PKC (Fig. 8B). We propose that this involves inhibition of PKC $\delta$  and activation of PKC $\alpha$ , and that PKC $\alpha$  is an inhibitor of

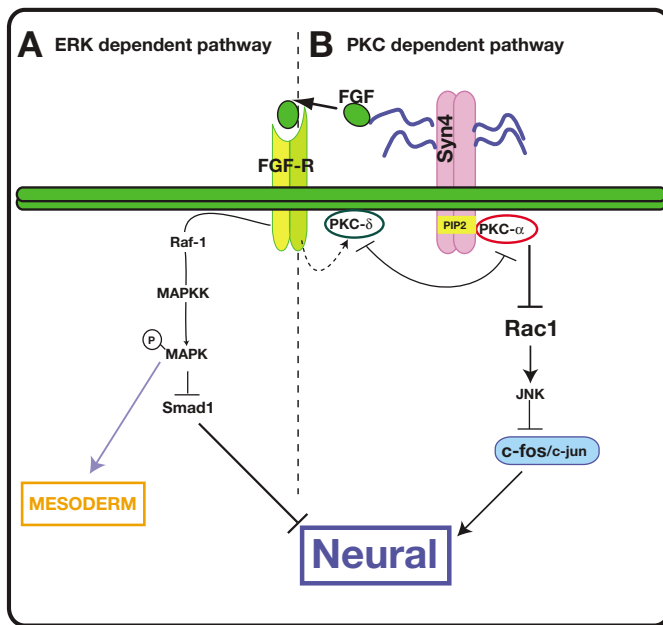

**Fig. 8. Model of neuralisation by Syn4.** (A) The Syn4/ERK-dependent pathway. The glycosaminoglycans (GAGs) in the extracellular domain of Syn4 activate the FGF/MAPK pathway. The activation of this pathway can lead to mesoderm induction, but also contributes to neural induction, probably through the inhibition of Smad1. (B) The Syn4/PKC-dependent pathway. The intracellular domain of Syn4 inhibits PKC $\delta$  and activates PKC $\alpha$ . The inhibition of PKC $\delta$  is required for the recruitment of PKC $\alpha$  to the membrane and its binding to Syn4. Activated PKC $\alpha$  inhibits Rac activity. Rac activates JNK, which phosphorylates c-Jun and inhibits the formation of the c-Jun/c-Fos dimers that form part of the AP-1 transcriptional regulator complex. Thus, the inhibition of Rac by Syn4/PKC $\alpha$  leads to the activation of the AP-1 complex that controls the transcription of preneural genes

the small GTPase Rac. Since the BMP-inhibiting effects of FGF act through MAPK (Kuroda et al., 2005), this pathway could account for the BMP-inhibition-independent role of FGF signalling in neural induction (Linker and Stern, 2004; Delaune et al., 2005; de Almeida et al., 2008). Rac is a well-known regulator of cell migration that acts by controlling actin polymerisation, but has not previously been implicated in neural induction. Evidence that Rac can control JNK activity (Chen et al., 2006; Habas et al., 2003) suggested the hypothesis that Syn4/PKC $\alpha$  might inhibit Rac activity by an increase in AP-1 (c-Fos/c-Jun) activity that is mediated through inhibition of JNK.

The AP-1 transcription factor complex incorporates c-Jun, c-Fos and ATF protein dimers and mediates gene regulation in response to a plethora of physiological and pathological stimuli (Hess et al., 2004). The relative abundance of AP-1 subunits seems to play a key role in gene regulation (Eferl and Wagner, 2003). c-Fos cannot dimerise and requires c-Jun to be active (Eferl and Wagner, 2003). When c-Jun is phosphorylated by JNK it becomes latent and unable to bind to DNA (Boyle et al., 1991). Activation of JNK inhibits heterodimeric AP-1.

PKC activated by TPA (12-O-tetradecanoylphorbol-13-acetate) dephosphorylates c-Jun and simultaneously increases AP-1 DNA-binding activity (Boyle et al., 1991). This is consistent with our results suggesting that Syn4/PKC $\alpha$  promotes the formation of the c-Fos/c-Jun complex (Fig. 8B). Additional support comes from the finding that overexpression of PKC $\alpha$  increases c-Fos levels in animal caps.

Studies of the preneural gene *Zic3* revealed that AP-1 binds directly to the *Zic3* promoter rather than to the c-Jun homodimer (Lee et al., 2004). Taken together, these data suggest that during neural induction, Syn4/PKC $\alpha$  might inhibit Rac to minimise JNK activity, facilitating formation of the c-Fos/c-Jun (AP-1) complex.

A role for PKC $\alpha$  in neural induction was first suggested almost 20 years ago (Otte et al., 1988; Otte et al., 1989; Otte et al., 1990; Otte et al., 1991; Otte and Moon, 1992) but had never been connected with the signalling pathways now known to be involved in neural induction. It was originally shown that PKC $\alpha$  is activated and translocated to the membrane during neural induction, and it was suggested that this is required to confer neural competence on the ectoderm (Otte et al., 1988; Otte et al., 1989; Otte et al., 1990; Otte et al., 1991; Otte and Moon, 1992). We have confirmed and extended these observations by showing that expression of PKC $\alpha$  in ventral ectoderm or in animal caps can act as a neuralising signal and that PKC $\alpha$  activity is regulated by interactions with Syn4 and PKC $\delta$ . PKC $\delta$  appears to work as a repressor of PKC $\alpha$ , whereas Syn4 appears to be required for PKC $\alpha$  activity; however, we also show that PKC $\alpha$  is required for the neuralising activity of Syn4. Thus, our finding allows us to propose a link between the PKC and FGF pathways, both of which have been identified previously as being involved in neural induction.

These observations have parallels in studies of migrating cells. Syn4 interacts with PIP $_2$ , and this stabilises the oligomeric structure of Syn4 and promotes the association of PKC $\alpha$  and Syn4 (Oh et al., 1997a; Oh et al., 1997b; Horowitz and Simons, 1998; Lim et al., 2003); the catalytic domain of PKC $\alpha$  binds to the cytoplasmic domain of Syn4, and PKC $\alpha$  is 'superactivated' (Lim et al., 2003; Murakami et al., 2002). This interaction between PKC $\alpha$  and Syn4 provides a satisfactory explanation for our observation that neural induction by Syn4 requires PKC $\alpha$  and vice versa. In addition, during cell migration, PKC $\delta$  phosphorylates Syn4, decreases its affinity for PIP $_2$  and abolishes its capacity to activate PKC $\alpha$  (Couchman et al., 2002; Murakami et al., 2002). We have found a similar negative regulation between PKC $\alpha$  and PKC $\delta$  during early neural plate development.

Despite several previous reports demonstrating direct phosphorylation of MAPK by PKC $\alpha$  (Mauro et al., 2002; Seo et al., 2004), we found no evidence that the PKC and MAPK pathways interact during neural induction other than indirectly, through Syn4. Neuralisation by PKC $\alpha$  is evidently MAPK-independent and PKC $\alpha$  does not affect MAPK activity. Another possibility is that Rac can affect MAPK signalling via PAK-MEK interactions, the amino acids T292 and S298 of MEK1 being essential for PAK-dependent ERK activity (Eblen et al., 2002). However, T292 is not conserved in *Xenopus* MEK1 (not shown), which could explain the absence of this regulatory pathway.

During cell migration, targets of the PKC pathway include small GTPases that control cytoskeletal organisation and adhesion to the extracellular matrix (Ridley et al., 2003). Our results suggest that Syn4/PKC $\alpha$  inhibits Rac activity during neural induction, as it does in migrating cells (Bass et al., 2007; Matthews et al., 2008). Expression of a dominant-negative Rac neuralises ventral ectoderm strongly, whereas activation of Rac inhibits neural induction by PKC $\alpha$ . However, activation of Rac in ventral ectoderm has no effect on neural plate markers, but induces neural crest markers (not shown), supporting recent reports of induction of neural crest by Rac/Rho activities (Broders-Brondon et al., 2007; Guemar et al., 2007).

We thank M. Sargent, C. Stern and C. Linker for comments on the manuscript; J. Couchman for the PKC $\alpha$  constructs; J.-K. Han for the pCS2+-human PKC $\alpha$  clone; N. Kinoshita for PKC $\delta$  constructs; and Oh and P. Kyung for the PKC $\alpha$ -



EGFP construct; and NIBB *Xenopus* Resources (Japan) for cDNAs. This work was supported by MRC and BBSRC grants to R.M. and by the Uehara Memorial Foundation to S.K. Deposited in PMC for release after 6 months.

#### Supplementary material

Supplementary material for this article is available at <http://dev.biologists.org/cgi/content/full/136/4/575/DC1>

#### References

- Alvarez, I. S., Araujo, M. and Nieto, M. A. (1998). Neural induction in whole chick embryo cultures by FGF. *Dev. Biol.* **199**, 42-54.
- Bass, M. D., Roach, K. A., Morgan, M. R., Mostafavi-Pour, Z., Schoen, T., Muramatsu, T., Mayer, U., Ballestrin, C., Spatz, J. P. and Humphries, M. J. (2007). Syndecan-4-dependent Rac1 regulation determines directional migration in response to the extracellular matrix. *J. Cell Biol.* **177**, 527-538.
- Bernfield, M., Gotte, M., Park, P. W., Reizes, O., Fitzgerald, M. L., Lincecum, J. and Zako, M. (1999). Functions of cell surface heparan sulfate proteoglycans. *Annu. Rev. Biochem.* **68**, 729-777.
- Bertrand, V., Hudson, C., Caillol, D., Popovici, C. and Lemaire, P. (2003). Neural tissue in ascidian embryos is induced by FGF9/16/20, acting via a combination of maternal GATA and Ets transcription factors. *Cell* **115**, 615-627.
- Boyle, W. J., Smeal, T., Defize, L. H., Angel, P., Woodgett, J. R., Karin, M. and Hunter, T. (1991). Activation of protein kinase C decreases phosphorylation of c-Jun at sites that negatively regulate its DNA-binding activity. *Cell* **64**, 573-584.
- Broders-Bondon, F., Chesneau, A., Romero-Oliva, F., Mazabraud, A., Mayor, R. and Thiery, J. P. (2007). Regulation of XSnail2 expression by Rho GTPases. *Dev. Dyn.* **236**, 2555-2566.
- Brule, S., Charnaux, N., Sutton, A., Ledoux, D., Chaigneau, T., Saffar, L. and Gattegno, L. (2006). The shedding of syndecan-4 and syndecan-1 from HeLa cells and human primary macrophages is accelerated by SDF-1/CXCL12 and mediated by the matrix metalloproteinase-9. *Glycobiology* **16**, 488-501.
- Charnaux, N., Brule, S., Hamon, M., Chaigneau, T., Saffar, L., Prost, C., Lievre, N. and Gattegno, L. (2005). Syndecan-4 is a signaling molecule for stromal cell-derived factor-1 (SDF-1)/CXCL12. *FEBS J.* **272**, 1937-1951.
- Chen, Y., Stump, R. J., Lovicu, F. J. and McAvoy, J. W. (2006). A role for Wnt/planar cell polarity signaling during lens fiber cell differentiation? *Semin. Cell Dev. Biol.* **17**, 712-725.
- Choi, S. C. and Han, J. K. (2002). *Xenopus* Cdc42 regulates convergent extension movements during gastrulation through Wnt/Ca<sup>2+</sup> signaling pathway. *Dev. Biol.* **244**, 342-357.
- Couchman, J. R. (2003). Syndecans: proteoglycan regulators of cell-surface microdomains? *Nat. Rev. Mol. Cell Biol.* **4**, 926-937.
- Couchman, J. R., Vogt, S., Lim, S. T., Lim, Y., Oh, E. S., Prestwich, G. D., Theibert, A., Lee, W. and Woods, A. (2002). Regulation of inositol phospholipid binding and signaling through syndecan-4. *J. Biol. Chem.* **277**, 49296-49303.
- de Almeida, I., Rolo, A., Batut, J., Hill, C., Stern, C. D. and Linker, C. (2008). Unexpected activities of Smad7 in *Xenopus* mesodermal and neural induction. *Mech. Dev.* **125**, 421-431.
- Delaune, E., Lemaire, P. and Kodjabachian, L. (2005). Neural induction in *Xenopus* requires early FGF signalling in addition to BMP inhibition. *Development* **132**, 299-310.
- Eblen, S. T., Slack, J. K., Weber, M. J. and Catling, A. D. (2002). Rac-PAK signaling stimulates extracellular signal-regulated kinase (ERK) activation by regulating formation of MEK1-ERK complexes. *Mol. Cell Biol.* **22**, 6023-6033.
- Eferl, R. and Wagner, E. F. (2003). AP-1: a double-edged sword in tumorigenesis. *Nat. Rev. Cancer* **3**, 859-868.
- Fuentealba, L. C., Eivers, E., Ikeda, A., Hurtado, C., Kuroda, H., Pera, E. M. and De Robertis, E. M. (2007). Integrating patterning signals: Wnt/GSK3 regulates the duration of the BMP/Smad1 signal. *Cell* **131**, 980-993.
- Graves, L. M., Northrop, J. L., Potts, B. C., Krebs, E. G. and Kimelman, D. (1994). Fibroblast growth factor, but not activin, is a potent activator of mitogen-activated protein kinase in *Xenopus* explants. *Proc. Natl. Acad. Sci. USA* **91**, 1662-1666.
- Grunz, H. and Tacke, L. (1989). Neural differentiation of *Xenopus laevis* ectoderm takes place after disaggregation and delayed reaggregation without inducer. *Cell Differ. Dev.* **28**, 211-217.
- Guemar, L., de Santa Barbara, P., Vignal, E., Maurel, B., Fort, P. and Faure, S. (2007). The small GTPase RhoV is an essential regulator of neural crest induction in *Xenopus*. *Dev. Biol.* **310**, 113-128.
- Habas, R., Dawid, I. B. and He, X. (2003). Coactivation of Rac and Rho by Wnt/PCP signaling is required for vertebrate gastrulation. *Genes Dev.* **17**, 295-309.
- Halazonetis, T. D., Georgopoulos, K., Greenberg, M. E. and Leder, P. (1988). c-Jun dimerizes with itself and with c-Fos, forming complexes of different DNA binding affinities. *Cell* **55**, 917-924.
- Harland, R. M. (1994). Neural induction in *Xenopus*. *Curr. Opin. Genet. Dev.* **4**, 543-549.
- Hartley, R. S., Lewellyn, A. L. and Maller, J. L. (1994). MAP kinase is activated during mesoderm induction in *Xenopus laevis*. *Dev. Biol.* **163**, 521-524.
- Hess, J., Angel, P. and Schorpp-Kistner, M. (2004). AP-1 subunits: quarrel and harmony among siblings. *J. Cell Sci.* **117**, 5965-5973.
- Hongo, I., Kengaku, M. and Okamoto, H. (1999). FGF signaling and the anterior neural induction in *Xenopus*. *Dev. Biol.* **216**, 561-581.
- Horowitz, A. and Simons, M. (1998). Phosphorylation of the cytoplasmic tail of syndecan-4 regulates activation of protein kinase Cα. *J. Biol. Chem.* **273**, 25548-25551.
- Horowitz, A., Murakami, M., Gao, Y. and Simons, M. (1999). Phosphatidylinositol-4,5-bisphosphate mediates the interaction of syndecan-4 with protein kinase C. *Biochemistry* **38**, 15871-15877.
- Horowitz, A., Tkachenko, E. and Simons, M. (2002). Fibroblast growth factor-specific modulation of cellular response by syndecan-4. *J. Cell Biol.* **157**, 715-725.
- Hou, S., Maccarana, M., Min, T. H., Strate, I. and Pera, E. M. (2007). The secreted serine protease xHtrA1 stimulates long-range FGF signaling in the early *Xenopus* embryo. *Dev. Cell* **13**, 226-241.
- Iemura, S., Yamamoto, T. S., Takagi, C., Uchiyama, H., Natsume, T., Shimasaki, S., Sugino, H. and Ueno, N. (1998). Direct binding of follistatin to a complex of bone-morphogenetic protein and its receptor inhibits ventral and epidermal cell fates in early *Xenopus* embryo. *Proc. Natl. Acad. Sci. USA* **95**, 9337-9342.
- Iozzo, R. V. (1998). Matrix proteoglycans: from molecular design to cellular function. *Annu. Rev. Biochem.* **67**, 609-652.
- Iwabuchi, T. and Goetinck, P. F. (2006). Syndecan-4 dependent FGF stimulation of mouse vibrissae growth. *Mech. Dev.* **123**, 831-841.
- Keum, E., Kim, Y., Kim, J., Kwon, S., Lim, Y., Han, I. and Oh, E. S. (2004). Syndecan-4 regulates localization, activity and stability of protein kinase C-α. *Biochem. J.* **378**, 1007-1014.
- Kinoshita, N., Iioka, H., Miyakoshi, A. and Ueno, N. (2003). PKC delta is essential for Dishevelled function in a noncanonical Wnt pathway that regulates *Xenopus* convergent extension movements. *Genes Dev.* **17**, 1663-1676.
- Kuriyama, S., Lupo, G., Ohta, K., Ohnuma, S., Harris, W. A. and Tanaka, H. (2006). Tsukushi controls ectodermal patterning and neural crest specification in *Xenopus* by direct regulation of BMP4 and X-delta-1 activity. *Development* **133**, 75-88.
- Kuroda, H., Fuentealba, L., Ikeda, A., Reversade, B. and De Robertis, E. M. (2005). Default neural induction: neuralization of dissociated *Xenopus* cells is mediated by Ras/MAPK activation. *Genes Dev.* **19**, 1022-1027.
- Lamb, T. M. and Harland, R. M. (1995). Fibroblast growth factor is a direct neural inducer, which combined with noggin generates anterior-posterior neural pattern. *Development* **121**, 3627-3636.
- Launay, C., Fromentoux, V., Shi, D. L. and Boucrot, J. C. (1996). A truncated FGF receptor blocks neural induction by endogenous *Xenopus* inducers. *Development* **122**, 869-880.
- Leclerc, C., Duprat, A. M. and Moreau, M. (1999). Noggin upregulates Fos expression by a calcium-mediated pathway in amphibian embryos. *Dev. Growth Differ.* **41**, 227-238.
- Lee, S. Y., Lee, H. S., Moon, J. S., Kim, J. I., Park, J. B., Lee, J. Y., Park, M. J. and Kim, J. (2004). Transcriptional regulation of Zic3 by heterodimeric AP-1(c-Jun/c-Fos) during *Xenopus* development. *Exp. Mol. Med.* **36**, 468-475.
- Lim, S. T., Longley, R. L., Couchman, J. R. and Woods, A. (2003). Direct binding of syndecan-4 cytoplasmic domain to the catalytic domain of protein kinase Cα increases focal adhesion localization of PKCα. *J. Biol. Chem.* **278**, 13795-13802.
- Linker, C. and Stern, C. D. (2004). Neural induction requires BMP inhibition only as a late step, and involves signals other than FGF and Wnt antagonists. *Development* **131**, 5671-5681.
- Matthews, H. K., Marchant, L., Carmona-Fontaine, C., Kuriyama, S., Larrain, J., Holt, M. R., Parsons, M. and Mayor, R. (2008). Directional migration of neural crest cells *in vivo* is regulated by Syndecan-4/Rac1 and non-canonical Wnt signaling/RhoA. *Development* **135**, 1771-1780.
- Mauro, A., Ciccarelli, C., De Cesaris, P., Scoglio, A., Bouche, M., Molinaro, M., Aquino, A. and Zani, B. M. (2002). PKCα-mediated ERK, JNK and p38 activation regulates the myogenic program in human rhabdomyosarcoma cells. *J. Cell Sci.* **115**, 3587-3599.
- Moody, S. A. (1987). Fates of the blastomeres of the 32-cell-stage *Xenopus* embryo. *Dev. Biol.* **122**, 300-319.
- Muñoz, R., Moreno, M., Oliva, C., Orbenes, C. and Larrain, J. (2006). Syndecan-4 regulates non-canonical Wnt signaling and is essential for convergent and extension movements in *Xenopus* embryos. *Nat. Cell Biol.* **8**, 492-500.
- Munoz-Sanjuan, I. and Brivanlou, A. H. (2002). Neural induction, the default model and embryonic stem cells. *Nat. Rev. Neurosci.* **3**, 271-280.
- Murakami, M., Horowitz, A., Tang, S., Ware, J. A. and Simons, M. (2002). Protein kinase C (PKC) delta regulates PKCα activity in a Syndecan-4-dependent manner. *J. Biol. Chem.* **277**, 20367-20371.
- Nakabeppu, Y., Ryder, K. and Nathans, D. (1988). DNA binding activities of three murine Jun proteins: stimulation by Fos. *Cell* **55**, 907-915.

- Newport, J. and Kirschner, M.** (1982). A major developmental transition in early *Xenopus* embryos: I. Characterization and timing of cellular changes at the midblastula stage. *Cell* **30**, 675-686.
- Nieuwkoop, P. D. and Faber, J.** (1967). *Normal Table of *Xenopus laevis* (Daudin)*. Amsterdam: North Holland Publishing.
- Oelgeschläger, M., Kuroda, H., Reversade, B. and De Robertis, E. M.** (2003). Chordin is required for the Spemann organizer transplantation phenomenon in *Xenopus* embryos. *Dev. Cell* **4**, 219-230.
- Oh, E. S., Woods, A. and Couchman, J. R.** (1997a). Multimerization of the cytoplasmic domain of syndecan-4 is required for its ability to activate protein kinase C. *J. Biol. Chem.* **272**, 11805-11811.
- Oh, E. S., Woods, A. and Couchman, J. R.** (1997b). Syndecan-4 proteoglycan regulates the distribution and activity of protein kinase C. *J. Biol. Chem.* **272**, 8133-8136.
- Otte, A. P. and Moon, R. T.** (1992). Protein kinase C isozymes have distinct roles in neural induction and competence in *Xenopus*. *Cell* **68**, 1021-1029.
- Otte, A. P., Koster, C. H., Snoek, G. T. and Durston, A. J.** (1988). Protein kinase C mediates neural induction in *Xenopus laevis*. *Nature* **334**, 618-620.
- Otte, A. P., van Run, P., Heideveld, M., van Driel, R. and Durston, A. J.** (1989). Neural induction is mediated by cross-talk between the protein kinase C and cyclic AMP pathways. *Cell* **58**, 641-648.
- Otte, A. P., Kramer, I. M., Manesse, M., Lambrechts, C. and Durston, A. J.** (1990). Characterization of protein kinase C in early *Xenopus* embryogenesis. *Development* **110**, 461-470.
- Otte, A. P., Kramer, I. M. and Durston, A. J.** (1991). Protein kinase C and regulation of the local competence of *Xenopus* ectoderm. *Science* **251**, 570-573.
- Pera, E. M., Ikeda, A., Eivers, E. and De Robertis, E. M.** (2003). Integration of IGF, FGF, and anti-BMP signals via Smad1 phosphorylation in neural induction. *Genes Dev.* **17**, 3023-3028.
- Piccolo, S., Sasai, Y., Lu, B. and De Robertis, E. M.** (1996). Dorsoventral patterning in *Xenopus*: inhibition of ventral signals by direct binding of chordin to BMP-4. *Cell* **86**, 589-598.
- Reichmann, E., Schwarz, H., Deiner, E. M., Leitner, I., Eilers, M., Berger, J., Busslinger, M. and Beug, H.** (1992). Activation of an inducible c-FosER fusion protein causes loss of epithelial polarity and triggers epithelial-fibroblastoid cell conversion. *Cell* **71**, 1103-1116.
- Ridley, A. J., Schwartz, M. A., Burridge, K., Firtel, R. A., Ginsberg, M. H., Borisy, G., Parsons, J. T. and Horwitz, A. R.** (2003). Cell migration: integrating signals from front to back. *Science* **302**, 1704-1709.
- Rogers, C. D., Archer, T. C., Cunningham, D. D., Grammer, T. C. and Casey, E. M.** (2008). Sox3 expression is maintained by FGF signaling and restricted to the neural plate by Vent proteins in the *Xenopus* embryo. *Dev. Biol.* **313**, 307-319.
- Rucci, N., DiGiacinto, C., Orru, L., Millimaggi, D., Baron, R. and Teti, A.** (2005). A novel protein kinase C alpha-dependent signal to ERK1/2 activated by alphaVbeta3 integrin in osteoclasts and in Chinese hamster ovary (CHO) cells. *J. Cell Sci.* **118**, 3263-3275.
- Sasai, Y., Lu, B., Steinbeisser, H., Geissert, D., Gont, L. K. and De Robertis, E. M.** (1994). *Xenopus* chordin: a novel dorsalizing factor activated by organizer-specific homeobox genes. *Cell* **79**, 779-790.
- Sato, S. M. and Sargent, T. D.** (1989). Development of neural inducing capacity in dissociated *Xenopus* embryos. *Dev. Biol.* **134**, 263-266.
- Seo, H. R., Kwan, Y. W., Cho, C. K., Bae, S., Lee, S. J., Soh, J. W., Chung, H. Y. and Lee, Y. S.** (2004). PKCalpha induces differentiation through ERK1/2 phosphorylation in mouse keratinocytes. *Exp. Mol. Med.* **36**, 292-299.
- Simons, M. and Horowitz, A.** (2001). Syndecan-4-mediated signalling. *Cell Signal.* **13**, 855-862.
- Sivak, J. M., Petersen, L. F. and Amaya, E.** (2005). FGF signal interpretation is directed by Sprouty and Spred proteins during mesoderm formation. *Dev. Cell* **8**, 689-701.
- Skaletzrrowski, A., Eschert, H., Leng, J., Stallmeyer, B., Sindermann, J., Pulawski, E. and Breithardt, G.** (2005). PKC  $\delta$ -induced activation of MAPK pathway is required for bFGF-stimulated proliferation of coronary smooth muscle cells. *Cardiovasc. Res.* **67**, 142-150.
- Smith, W. C., Knecht, A. K., Wu, M. and Harland, R. M.** (1993). Secreted noggin protein mimics the Spemann organizer in dorsalizing *Xenopus* mesoderm. *Nature* **361**, 547-549.
- Stern, C.** (2005). Neural induction: old problem, new findings, yet more questions. *Development* **132**, 2007-2021.
- Streit, A., Lee, K. J., Woo, I., Roberts, C., Jessell, T. M. and Stern, C. D.** (1998). Chordin regulates primitive streak development and the stability of induced neural cells, but is not sufficient for neural induction in the chick embryo. *Development* **125**, 507-519.
- Streit, A., Berliner, A. J., Papanayotou, C., Sirulnik, A. and Stern, C. D.** (2000). Initiation of neural induction by FGF signalling before gastrulation. *Nature* **406**, 74-78.
- Tahinci, E. and Symes, K.** (2003). Distinct functions of Rho and Rac are required for convergent extension during *Xenopus* gastrulation. *Dev. Biol.* **259**, 318-335.
- Tannahill, D., Isaacs, H. V., Close, M. J., Peters, G. and Slack, J. M.** (1992). Developmental expression of the *Xenopus* int-2 (FGF-3) gene: activation by mesodermal and neural induction. *Development* **115**, 695-702.
- Tkachenko, E. and Simons, M.** (2002). Clustering induces redistribution of syndecan-4 core protein into raft membrane domains. *J. Biol. Chem.* **277**, 19946-19951.
- Tkachenko, E., Lutgens, E., Stan, R. V. and Simons, M.** (2004). Fibroblast growth factor 2 endocytosis in endothelial cells proceed via syndecan-4-dependent activation of Rac1 and a Cdc42-dependent macropinocytic pathway. *J. Cell Sci.* **117**, 3189-3199.
- Weinstein, D. C. and Hemmati-Brivanlou, A.** (1997). Neural induction in *Xenopus laevis*: evidence for the default model. *Curr. Opin. Neurobiol.* **7**, 7-12.
- Wen-sheng, W.** (2006). Protein kinase C  $\alpha$  trigger Ras and Raf-independent MEK/ERK activation for TPA-induced growth inhibition of human hepatoma cell HepG2. *Cancer Lett.* **239**, 27-35.
- Wilson, S. I., Graziano, E., Harland, R., Jessell, T. M. and Edlund, T.** (2000). An early requirement for FGF signalling in the acquisition of neural cell fate in the chick embryo. *Curr. Biol.* **10**, 421-429.
- Woods, A. and Couchman, J. R.** (2001). Syndecan-4 and focal adhesion function. *Curr. Opin. Cell Biol.* **13**, 578-583.
